# Supplementary material for: In vivotoxicology of carbon dots by1H NMR-based metabolomics
Source: Royal Society of Chemistry journal article supplement (doi:10.1039/c8tx00049b), 2018-01-01
Supplement: c8tx00049b1.pdf [file c8tx00049b1.pdf]

20

21

22

23

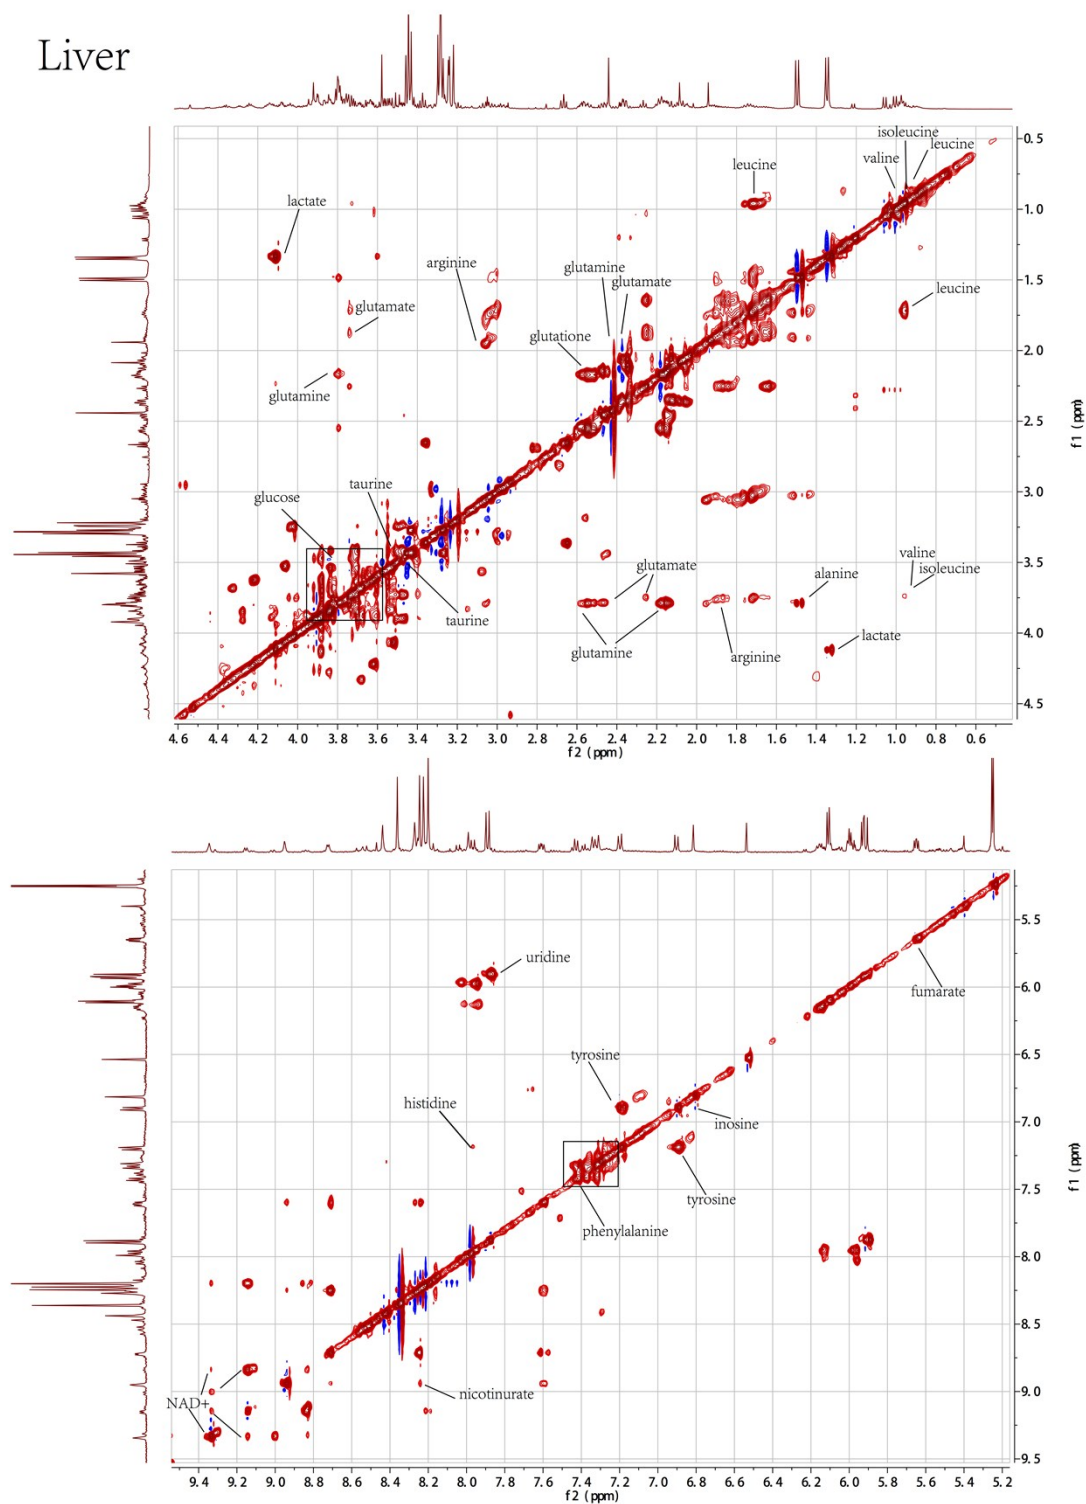

24

25 Fig. S1 Overlay of the TOCSY contour plots with assignments of all metabolite for liver. (PULPROG:

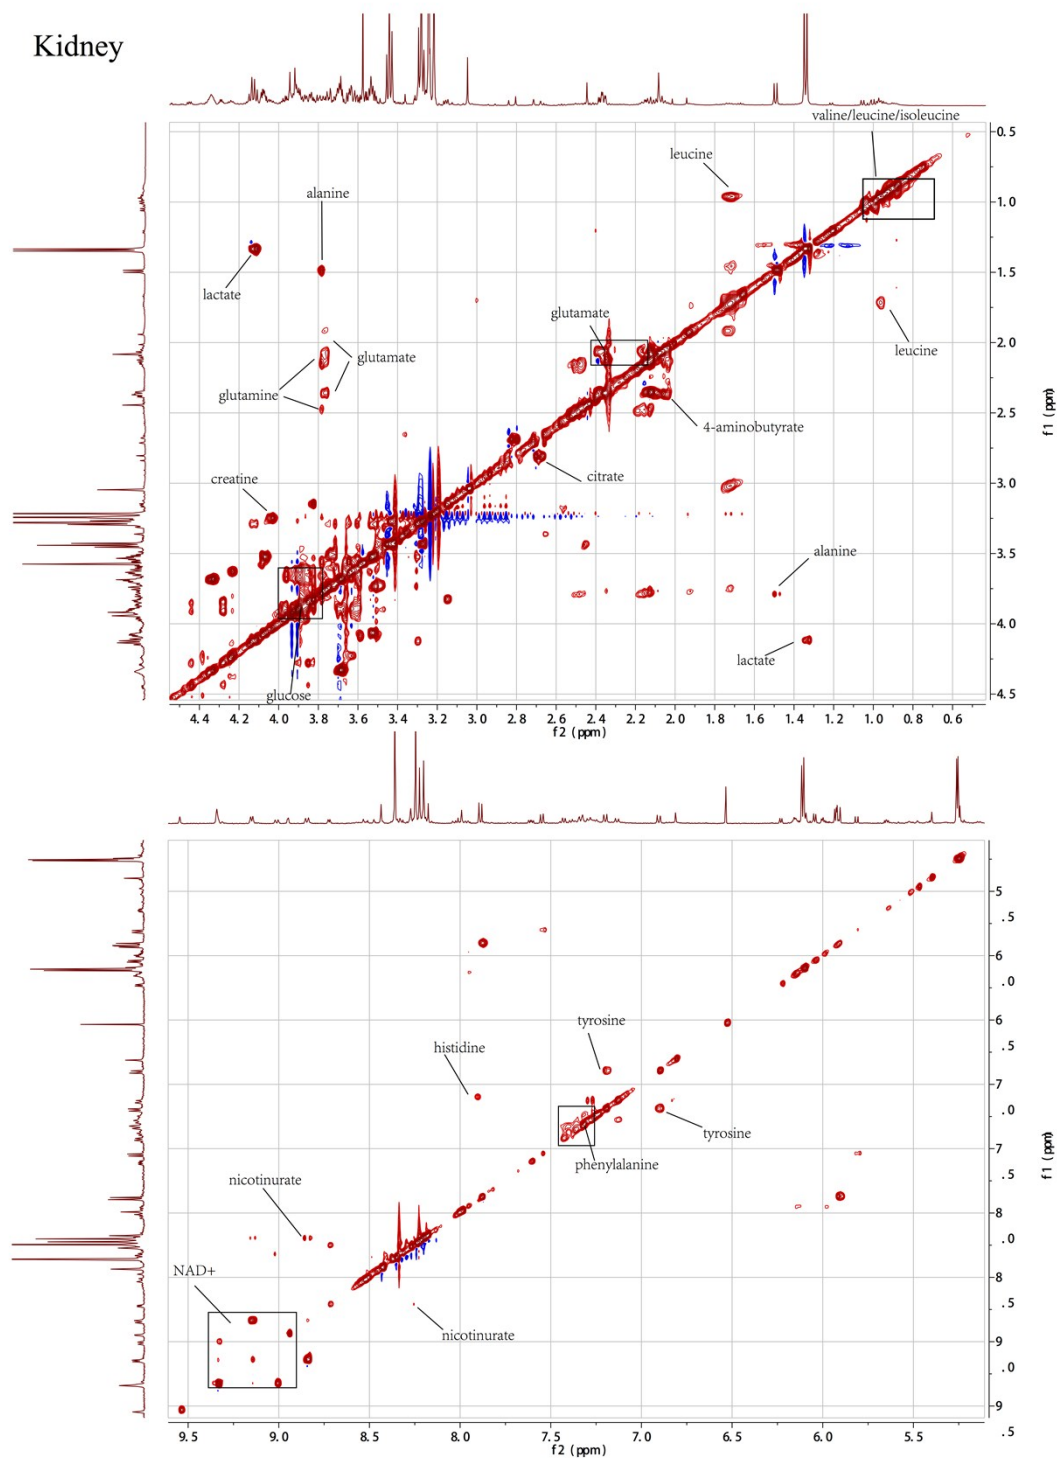

27

28 Fig. S2 Overlay of the TOCSY contour plots with assignments of all metabolite for kidney.

29 (PULPROG: mlevphpp; AQ\_mod: DQD; FnMODE: States-TPPI; TD: 2048, 256; NS: 8; DS: 16; TD0:

30 1.)

Spleen

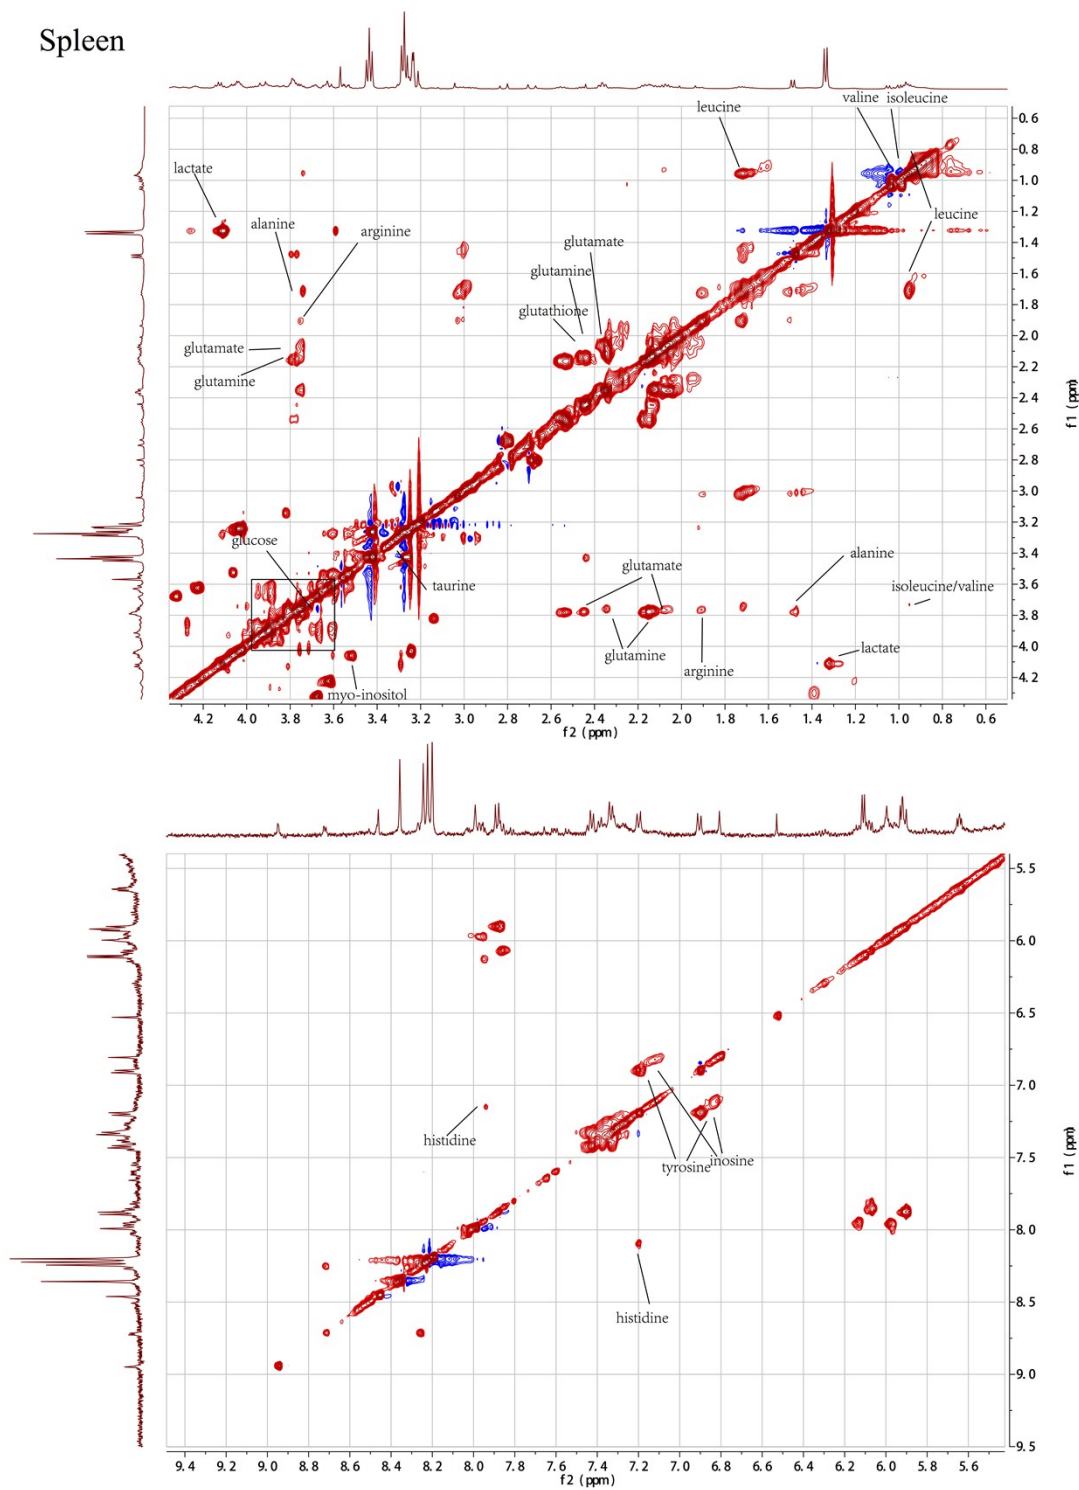

31

32 Fig. S3 Overlay of the TOCSY contour plots with assignments of all metabolite for spleen. (PULPROG:  
 33 mlevphpp; AQ\_mod: DQD; FnMODE: States-TPPI; TD: 2048, 256; NS: 8; DS: 16; TD0: 1.)

34

Serum

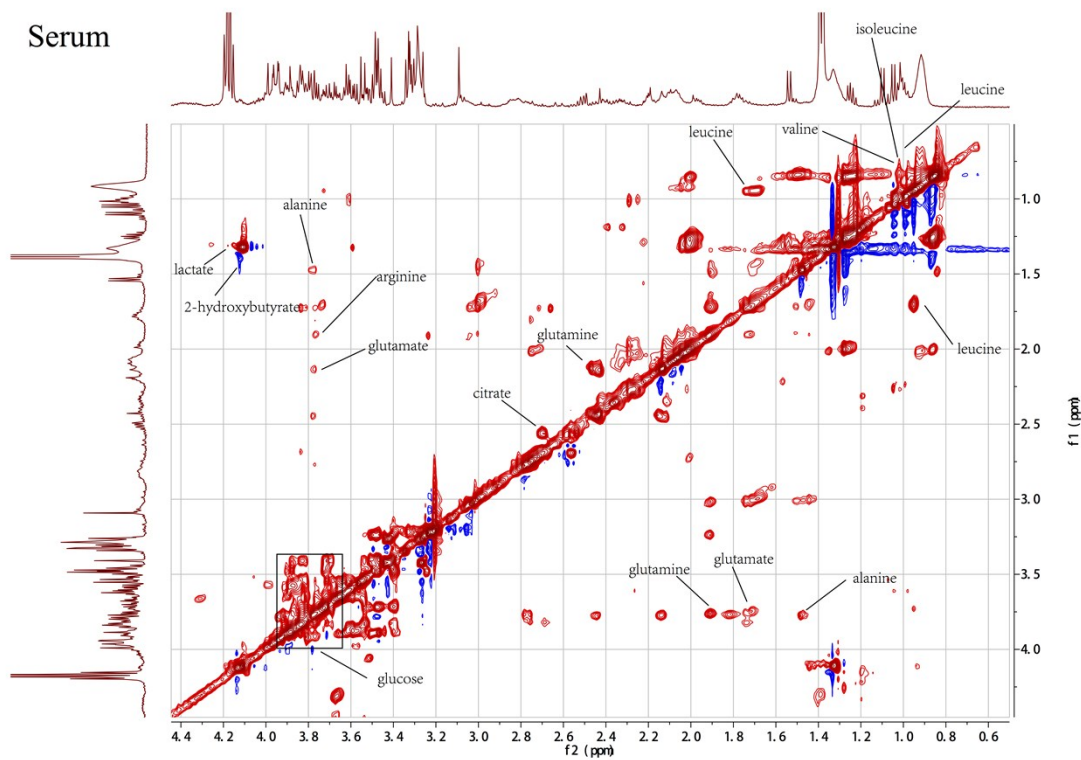

35

36 Fig. S4 Overlay of the TOCSY contour plots with assignments of most metabolite for serum.

37 (PULPROG: mlevphpp; AQ\_mod: DQD; FnMODE: States-TPPI; TD: 2048, 256; NS: 8; DS: 16; TD0:

38 1.)
